# Supplementary material for: Metabolomic analysis of aqueous humor reveals potential metabolite biomarkers for differential detection of macular edema
Source: PubMed Central journal article supplement (PMC10067239; doi:10.1186/s40662-023-00331-8), 2023-04-01

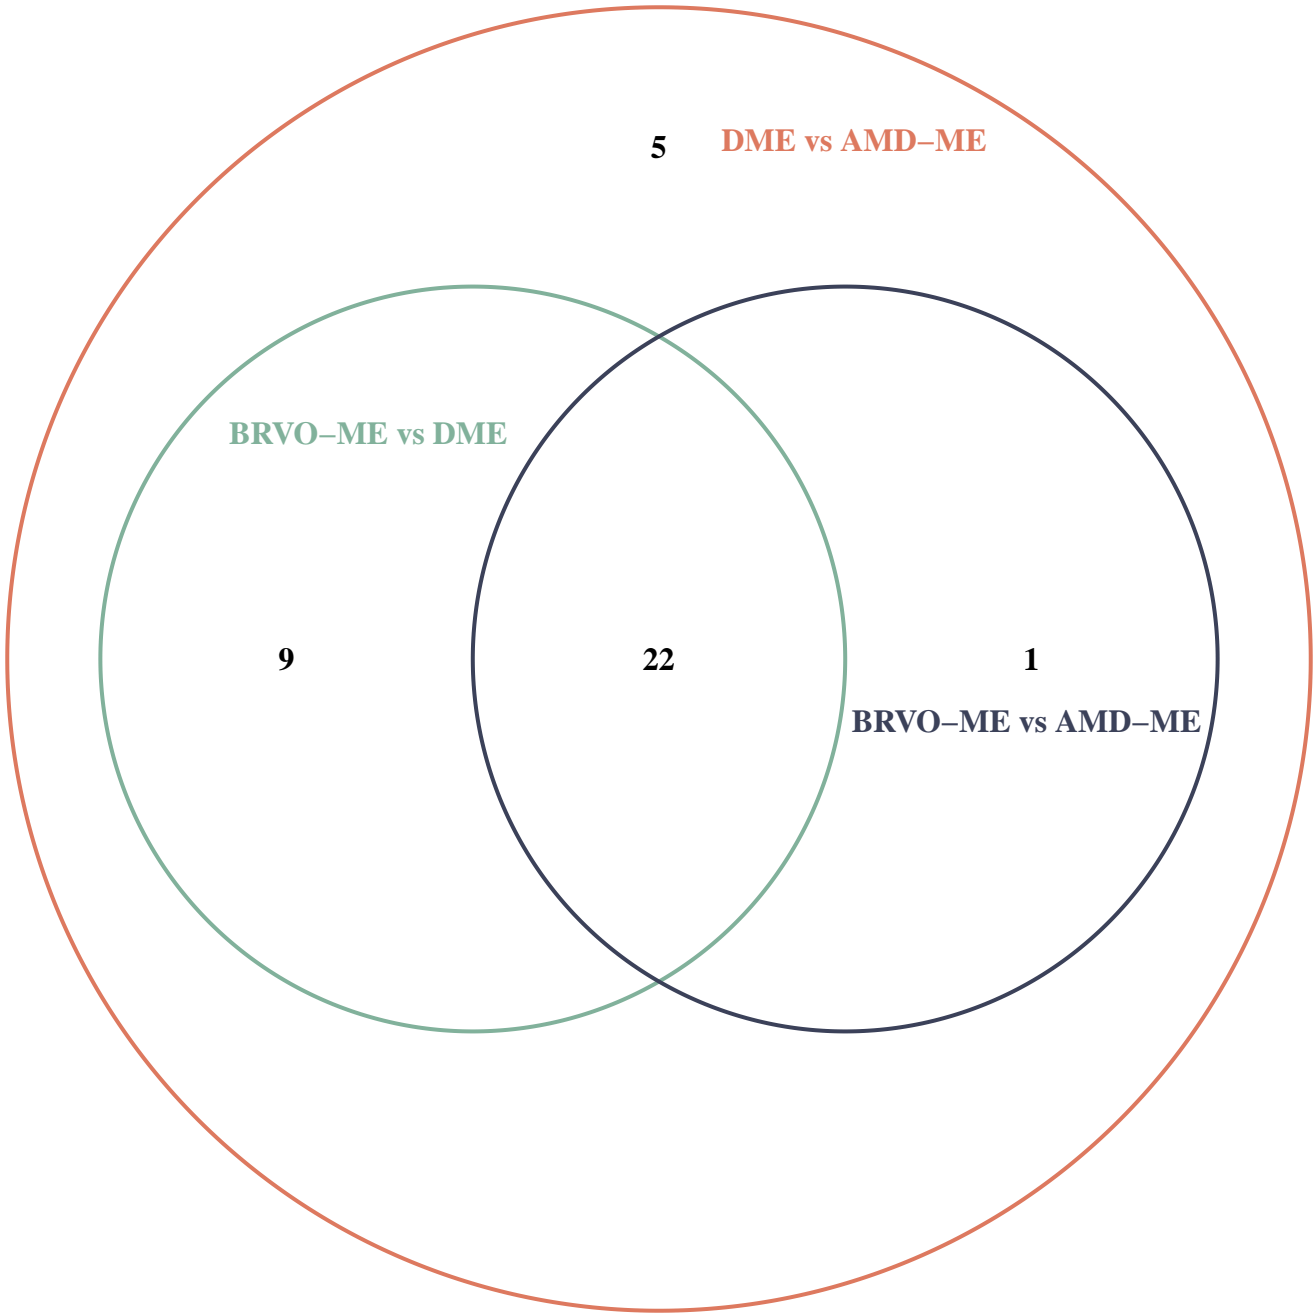

Supplement: 40662_2023_331_MOESM5_ESM.pdf [file 40662_2023_331_MOESM5_ESM.pdf]
